# Supplementary material for: Lifespan estimation in marine turtles using genomic promoter CpG density
Source: PLoS One. 2020 Jul 31;15(7):e0236888. doi: 10.1371/journal.pone.0236888 (PMC7394378; doi:10.1371/journal.pone.0236888)
Supplement: S2 Appendix — (XLSX) [file pone.0236888.s002.xlsx]

## Sheet: S2
S2 Appendix. Species specific annealing temperatures for each primer pair.
Promoter	Green sea turtle	Leatherback sea turtle	Loggerhead sea turtle	Olive Ridley sea turtle	Hawksbill sea turtle	Flatback sea turtle
FP003100	60	48	60	60	60	60
FP004897	60	59.1	60	60	60	60
FP005635	60	50.8	60	60	60	57.5
FP007180	60	57.5	60	60	60	60
FP010132	60	50.8	60	60	60	60
FP010903	60	54.5	60	60	50.8	50.8
FP015095	60	54.5	60	60	60	60
FP016407	60	59.1	60	60	60	60
FP022112	60	57.5	60	60	60	60
FP023502	60	57.5	60	60	60	60
FP024524	60	50.8	60	60	50.8	60
FP024552	60	54.5	60	60	57.5	54.5
FP027242	60	50.8	60	60	50.8	59.1
